# Supplementary material for: Diet Quality Trajectories over Adulthood in a Biracial Urban Sample from the Healthy Aging in Neighborhoods of Diversity across the Life Span Study
Source: MDPI journal article supplement (doi:10.3390/nu15143099), 2023-07-11
Supplement: s1 [file s1]

## Supplementary analyses

Figure S1. Spaghetti plot of HEI diet quality group trajectories

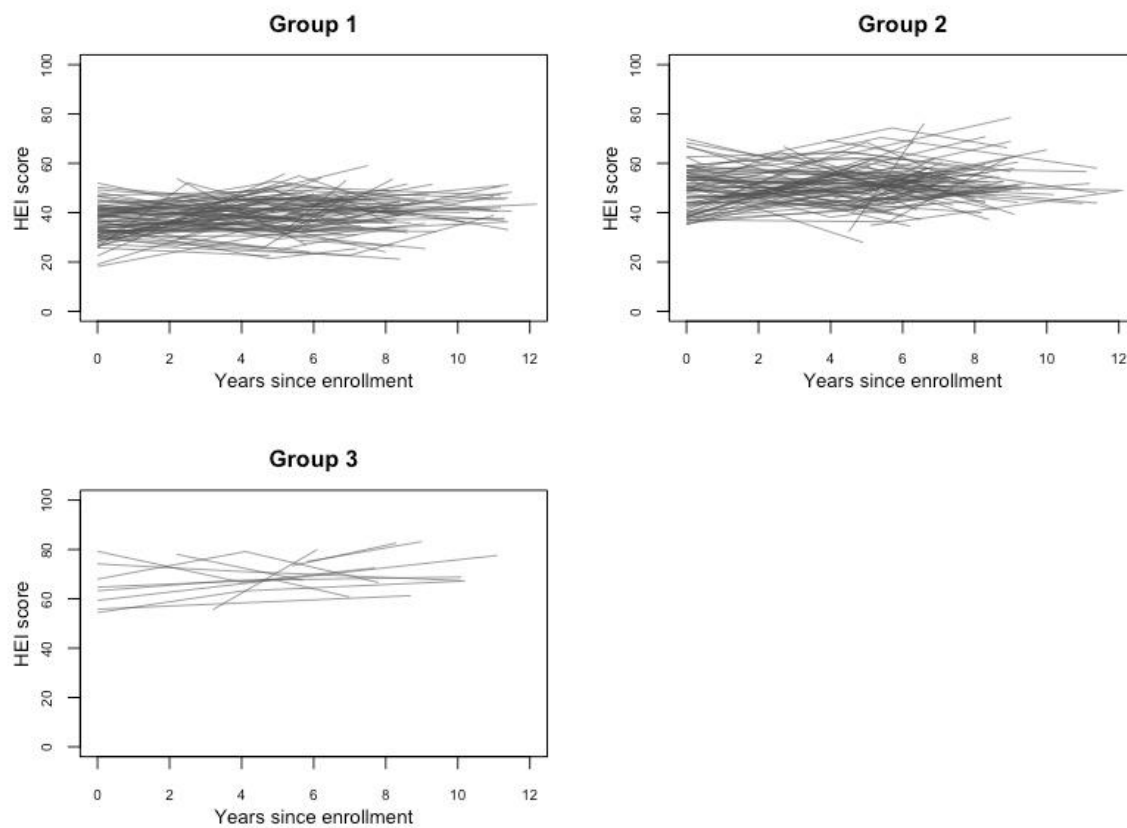

Figure S2. Spaghetti plot of DII diet quality group trajectories

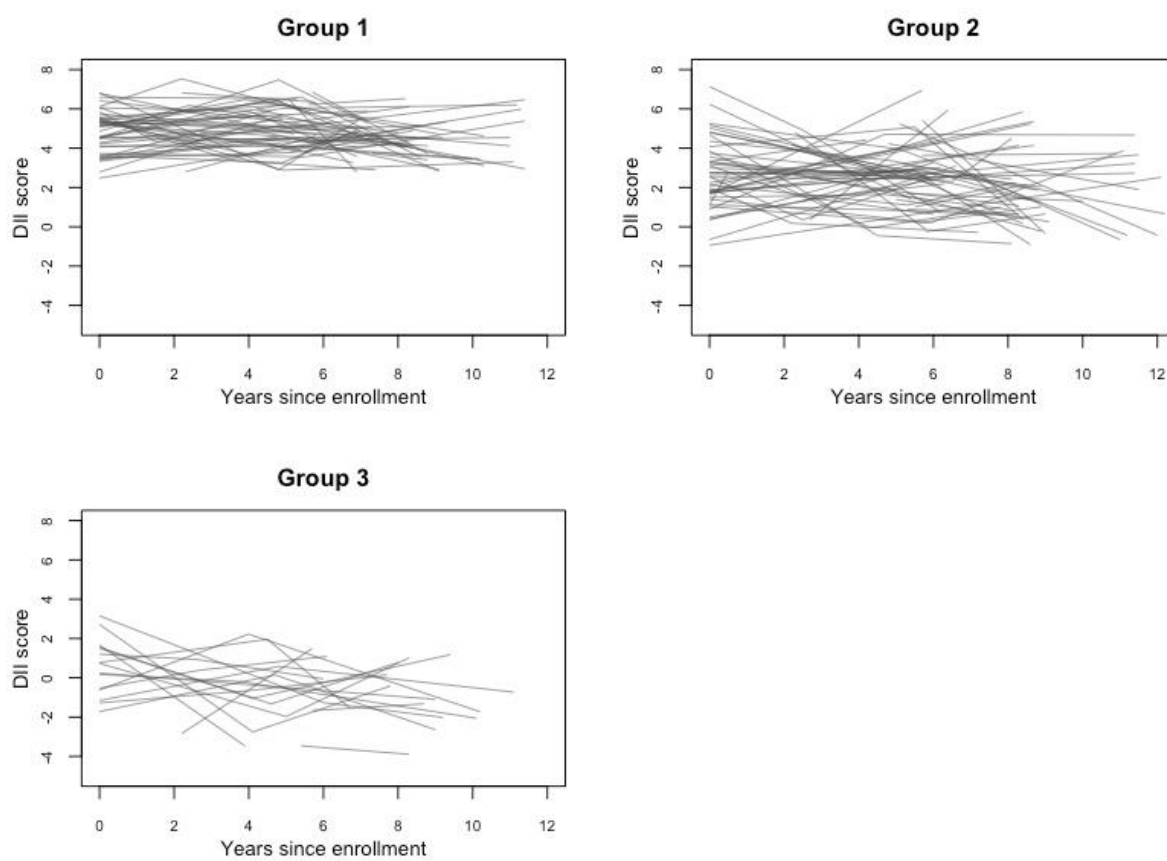

Figure S3. Spaghetti plot of MAR diet quality group trajectories

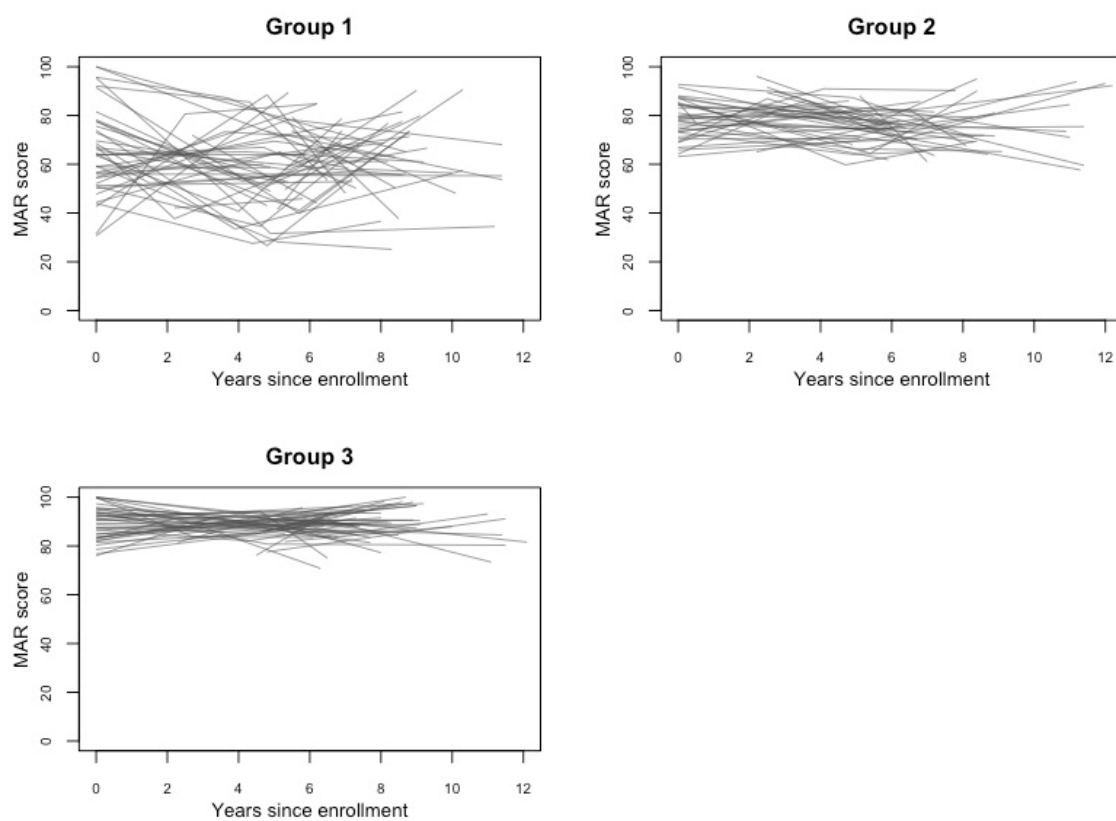

Figure S4. Scatterplots displaying correlation of diet quality scores between visits by index for HANDLS study sample

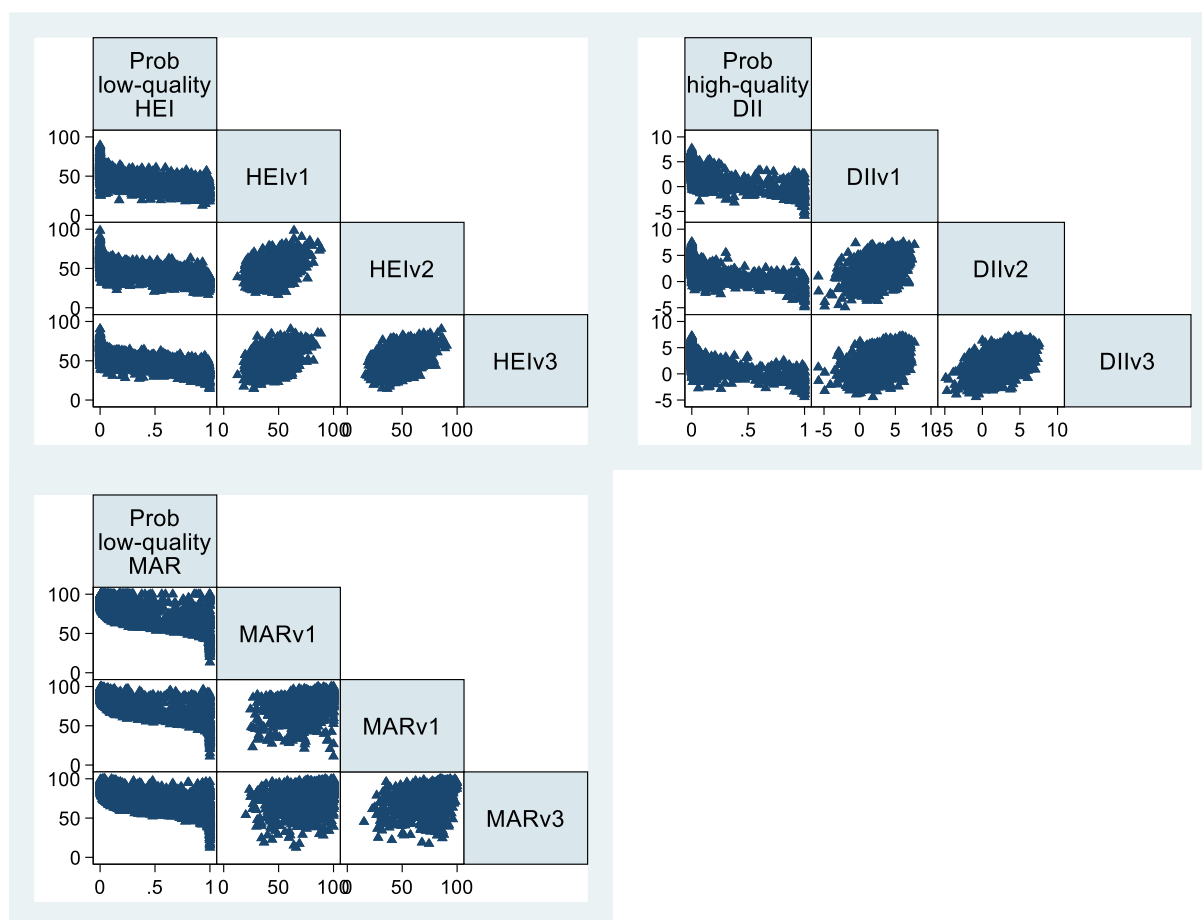

Abbreviations: HEI-Healthy Eating Index-2010, DII – Dietary Inflammatory Index, MAR- Mean Nutrient Adequacy, v-visit, y-axis displays diet quality index score with the range relevant to the index, x-axis, correlation statistic ranging from 0 to 1.

Table S1. Group trajectory membership by diet quality index

**Healthy Eating Index**

| Group | Parameter | Standard Estimate | T Error | for H0: Parameter=0 | Prob > T |
|-------|-----------|-------------------|---------|---------------------|----------|
| 1     | Intercept | 29.87102          | 1.29335 | 23.096              | 0        |
|       | Linear    | 0.37483           | 0.02779 | 13.49               | 0        |
| 2     | Intercept | 31.14183          | 1.21663 | 25.597              | 0        |
|       | Linear    | 0.14664           | 0.02393 | 6.127               | 0        |
| 3     | Intercept | 50.03678          | 3.37714 | 14.816              | 0        |
|       | Linear    | 0.33477           | 0.06189 | 5.409               | 0        |
| 1     | Sigma     | 9.85871           | 0.18013 | 54.731              | 0        |
| 2     | Sigma     | 8.26014           | 0.22219 | 37.176              | 0        |
| 3     | Sigma     | 9.54805           | 0.60493 | 15.784              | 0        |

## Group membership

|       |          |         |        |        |
|-------|----------|---------|--------|--------|
| 1 (%) | 48.29078 | 4.18941 | 11.527 | 0.0000 |
| 2 (%) | 46.07834 | 4.76126 | 9.678  | 0.0000 |
| 3 (%) | 5.63088  | 1.09093 | 5.162  | 0.0000 |

BIC=-24380.79 (N=6383) BIC=-24376.49 (N=2919) AIC=-24343.61 ll= -24332.61

## Parameter estimates for adding risk factors

29.87102, 0.37483, 31.14183, 0.14664, 50.03678, 0.33477,  
9.85871, 8.26014, 9.54805, -0.04690, -2.14898

## Parameter estimates

29.87102, 0.37483, 31.14183, 0.14664, 50.03678, 0.33477,  
9.85871, 8.26014, 9.54805, 48.29078, 46.07834, 5.63088

Entropy = 0.579

**Dietary Inflammatory Potential**

| Group | Parameter | Standard Estimate | T Error | for | H0: Parameter=0 | Prob > T |
|-------|-----------|-------------------|---------|-----|-----------------|----------|
| 1     | Intercept | 3.8932            | 0.20858 |     | 18.666          | 0        |
|       | Linear    | -0.02419          | 0.0039  |     | -6.206          | 0        |
| 2     | Intercept | 5.17053           | 0.22325 |     | 23.16           | 0        |
|       | Linear    | -0.01158          | 0.00393 |     | -2.944          | 0.0033   |
| 3     | Intercept | 0.17847           | 0.54678 |     | 0.326           | 0.7441   |
|       | Linear    | -0.00806          | 0.01028 |     | -0.784          | 0.4331   |
| 1     | Sigma     | 1.69323           | 0.02734 |     | 61.928          | 0        |
| 2     | Sigma     | 1.25856           | 0.04221 |     | 29.815          | 0        |
| 3     | Sigma     | 1.82018           | 0.07199 |     | 25.285          | 0        |

**Group membership**

|   |     |          |         |        |        |
|---|-----|----------|---------|--------|--------|
| 1 | (%) | 57.65107 | 2.85709 | 20.178 | 0.0000 |
| 2 | (%) | 32.25760 | 3.34801 | 9.635  | 0.0000 |
| 3 | (%) | 10.09134 | 1.42685 | 7.072  | 0.0000 |

BIC=-13285.80 (N=6383) BIC=-13281.50 (N=2918) AIC=-13248.62 ll= -13237.62

**Parameter estimates for adding risk factors**

3.89320, -0.02419, 5.17053, -0.01158, 0.17847, -0.00806,  
1.69323, 1.25856, 1.82018, -0.58066, -1.74273

**Parameter estimates**

3.89320, -0.02419, 5.17053, -0.01158, 0.17847, -0.00806,  
1.69323, 1.25856, 1.82018, 57.65107, 32.25760, 10.09134

Entropy = 0.594

**Mean Adequacy Ratio**

| Group | Parameter | Standard Estimate | T Error | for | HO: Parameter | Prob>T |
|-------|-----------|-------------------|---------|-----|---------------|--------|
| 1     | Intercept | 68.82505          | 2.67874 |     | 25.693        | 0      |
|       | Linear    | -0.07735          | 0.04741 |     | -1.631        | 0.1029 |
| 2     | Intercept | 95.19269          | 1.48648 |     | 64.039        | 0      |
|       | Linear    | -0.12109          | 0.02519 |     | -4.807        | 0      |
| 3     | Intercept | 84.1768           | 1.61125 |     | 52.243        | 0      |
|       | Linear    | -0.12099          | 0.02991 |     | -4.046        | 0.0001 |
| 1     | Sigma     | 17.15801          | 0.39113 |     | 43.868        | 0      |
| 2     | Sigma     | 6.87085           | 0.24368 |     | 28.196        | 0      |
| 3     | Sigma     | 9.71419           | 0.34143 |     | 28.452        | 0      |

**Group membership**

|   |     |          |         |        |        |
|---|-----|----------|---------|--------|--------|
| 1 | (%) | 29.93478 | 2.67402 | 11.195 | 0.0000 |
| 2 | (%) | 26.94840 | 2.75761 | 9.772  | 0.0000 |
| 3 | (%) | 43.11682 | 2.67681 | 16.108 | 0.0000 |

BIC=-25218.99 (N=6383) BIC=-25214.68 (N=2919) AIC=-25181.80 ll= -25170.80

**Parameter estimates for adding risk factors**

68.82505, -0.07735, 95.19269, -0.12109, 84.17680, -0.12099,  
17.15801, 6.87085, 9.71419, -0.10510, 0.36489

**Parameter estimates**

68.82505, -0.07735, 95.19269, -0.12109, 84.17680, -0.12099,  
17.15801, 6.87085, 9.71419, 29.93478, 26.94840, 43.11682

Entropy = 0.485
